# Supplementary material for: Synthesis and Biological Evaluation of Novel Urea- and Guanidine-Based Derivatives for the Treatment of Obesity-Related Hepatic Steatosis
Source: MDPI journal article supplement (doi:10.3390/molecules19056163), 2014-05-15

# Supplementary Materials

## Table of Contents

1. The  $^1\text{H}$ -NMR spectra of compounds **7**, **8**, **14**, **17**
2. The  $^{13}\text{C}$ -NMR and HPLC spectra of **7i**
1. The  $^1\text{H}$ -NMR spectrum of compounds **7**, **8**, **14**, **17**

**Figure S1.**  $^1\text{H}$ -NMR of compound **7a** in  $\text{DMSO}-d_6$ .

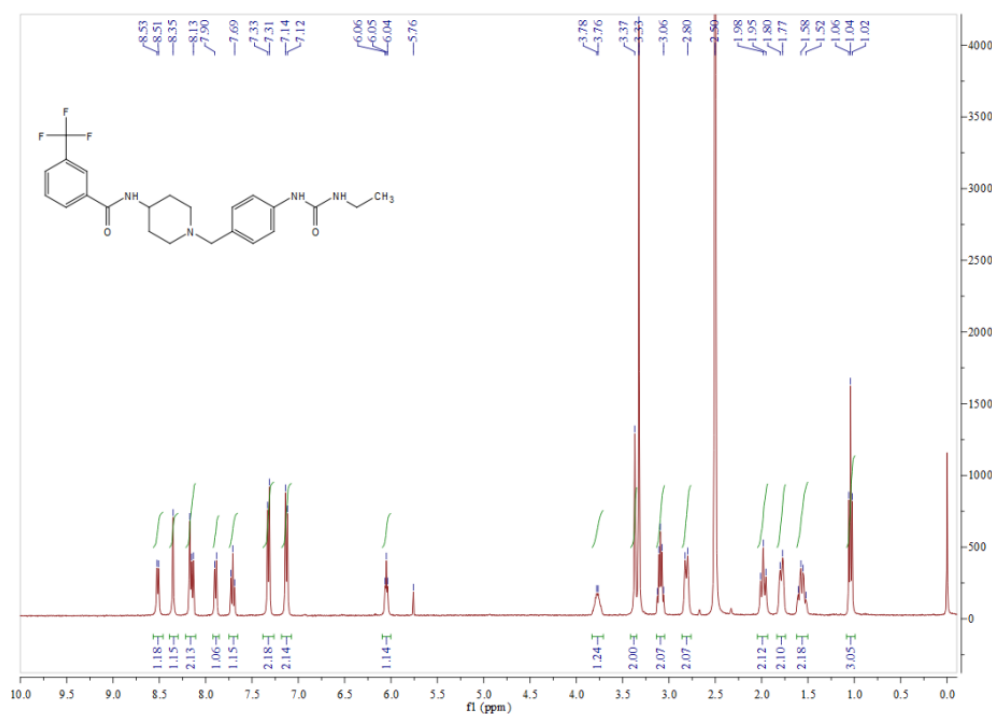

**Figure S2.**  $^1\text{H}$ -NMR of compound **7b** in  $\text{DMSO}-d_6$ .

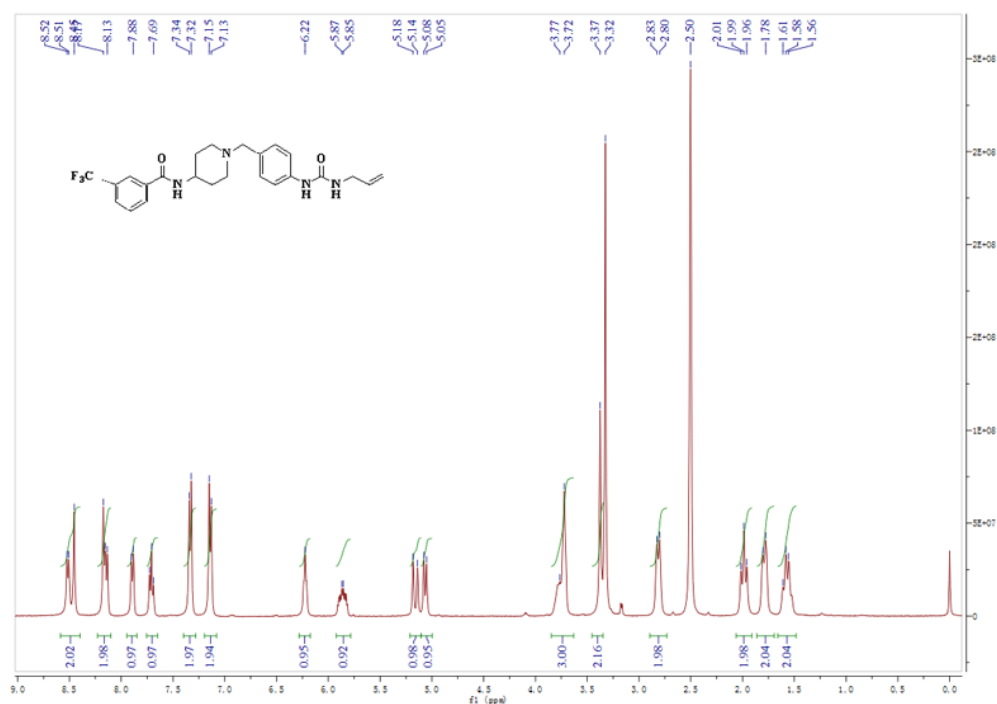

**Figure S3.**  $^1\text{H}$ -NMR of compound **7c** in  $\text{DMSO}-d_6$ .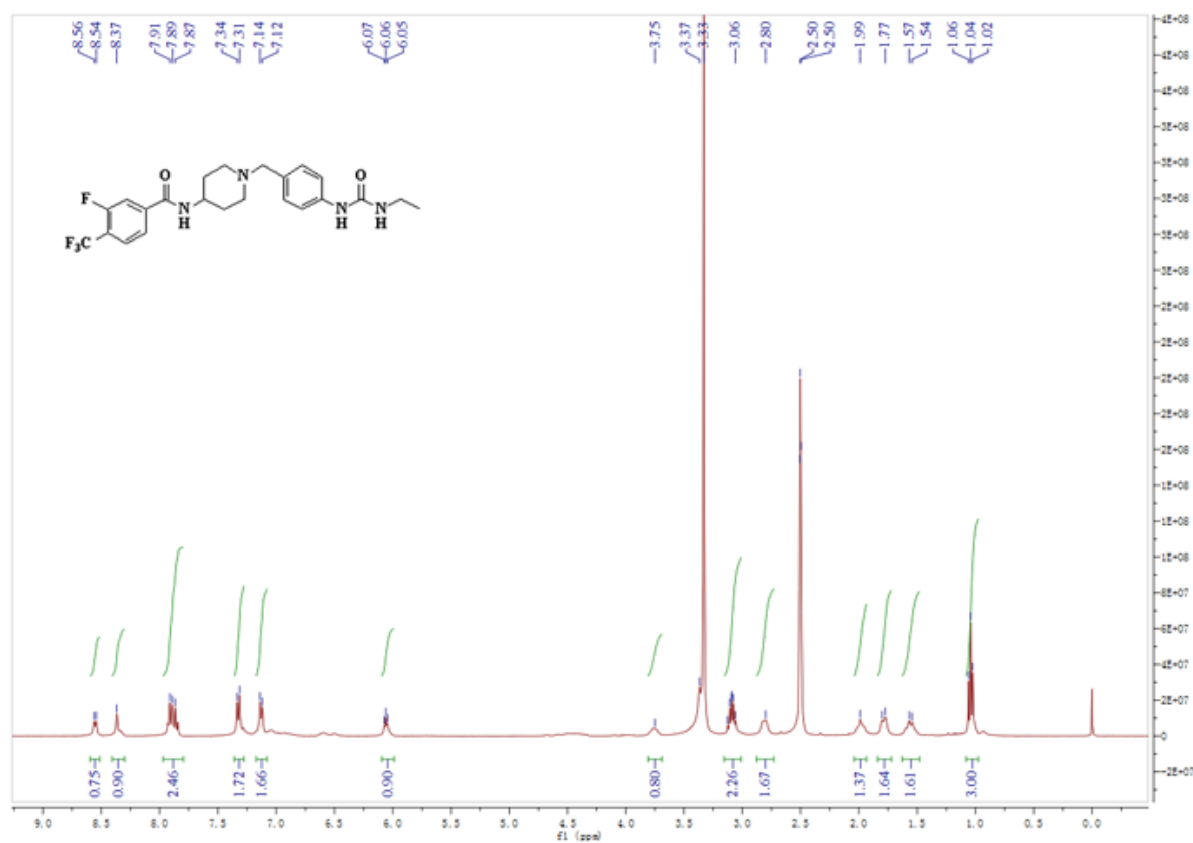**Figure S4.**  $^1\text{H}$ -NMR of compound **7d** in  $\text{CD}_3\text{OD}$ .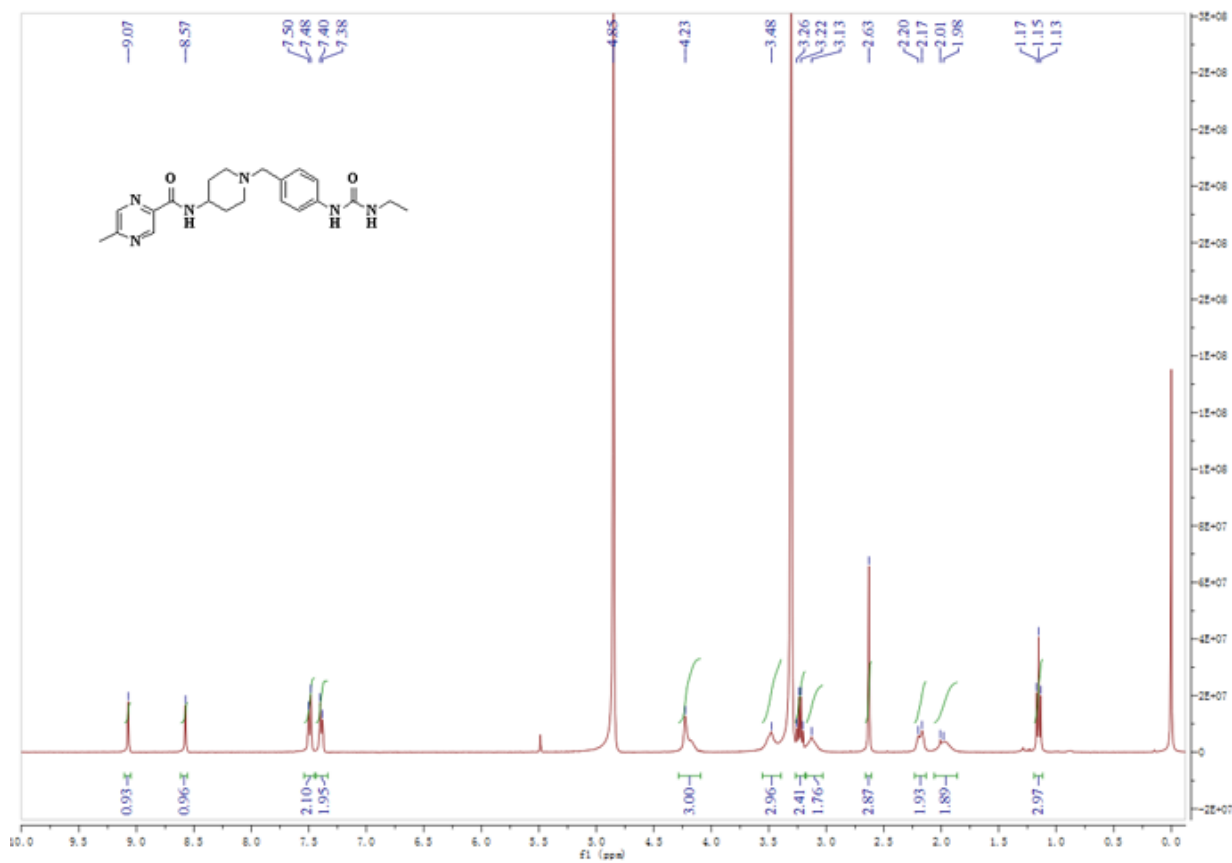

**Figure S5.**  $^1\text{H}$ -NMR of compound **7f** in  $\text{CD}_3\text{OD}$ .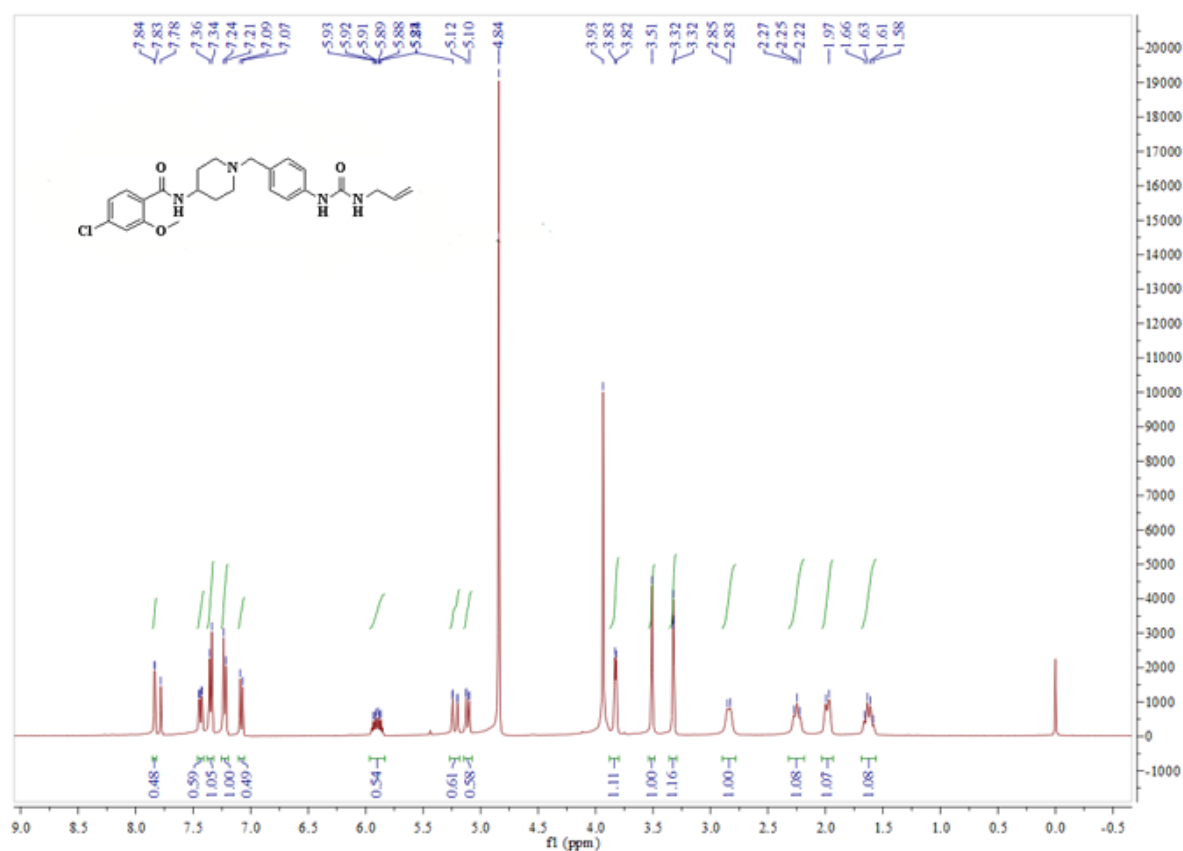**Figure S6.**  $^1\text{H}$ -NMR of compound **7g** in  $\text{DMSO}-d_6$ .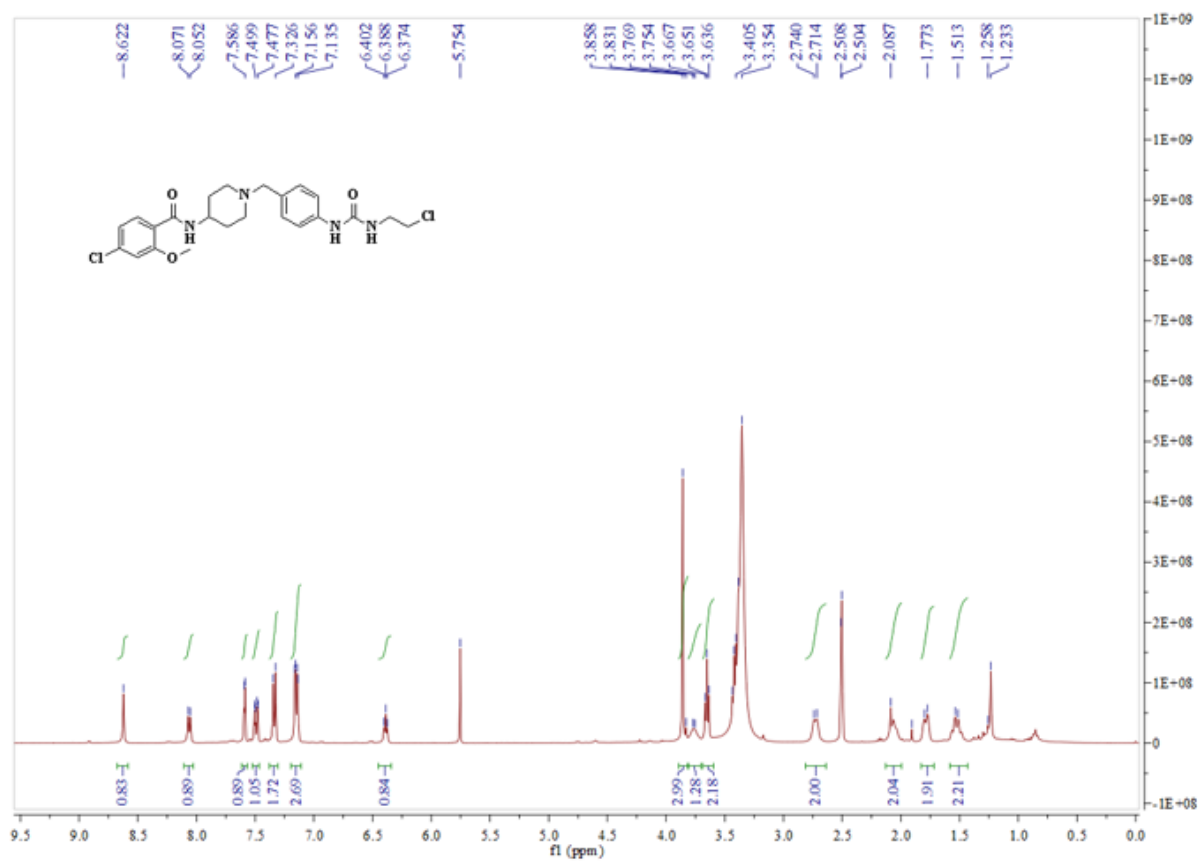

**Figure S7.**  $^1\text{H}$ -NMR of compound **7h** in  $\text{DMSO}-d_6$ .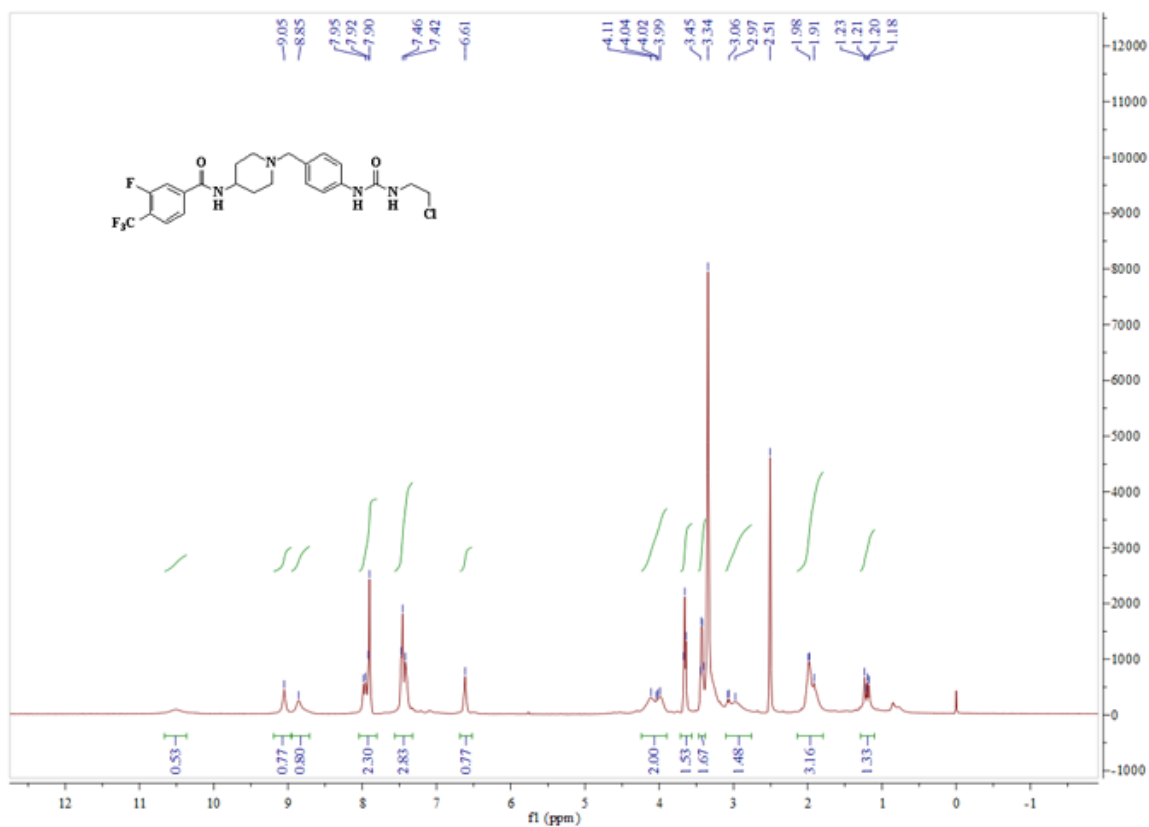**Figure S8.**  $^1\text{H}$ -NMR of compound **7i** in  $\text{DMSO}-d_6$ .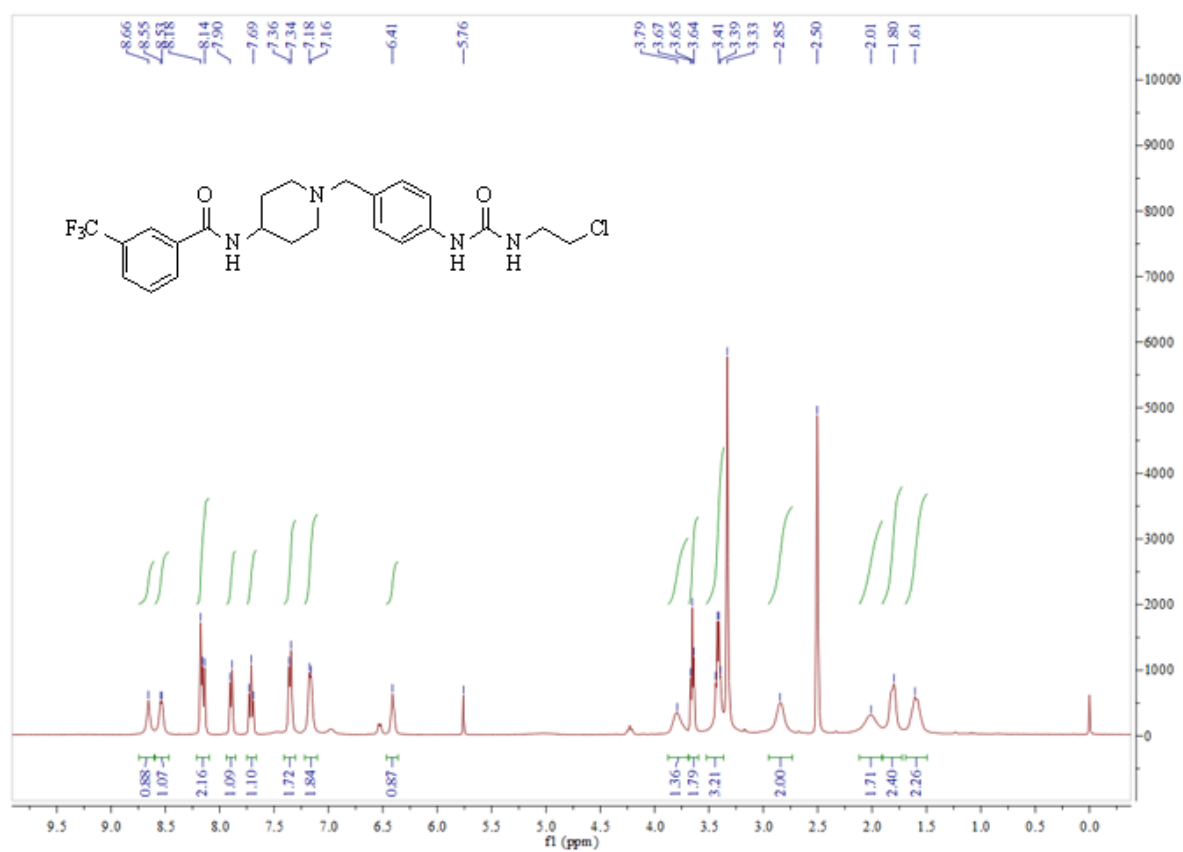

**Figure S9.**  $^1\text{H}$ -NMR of compound **7j** in  $\text{CDCl}_3$ .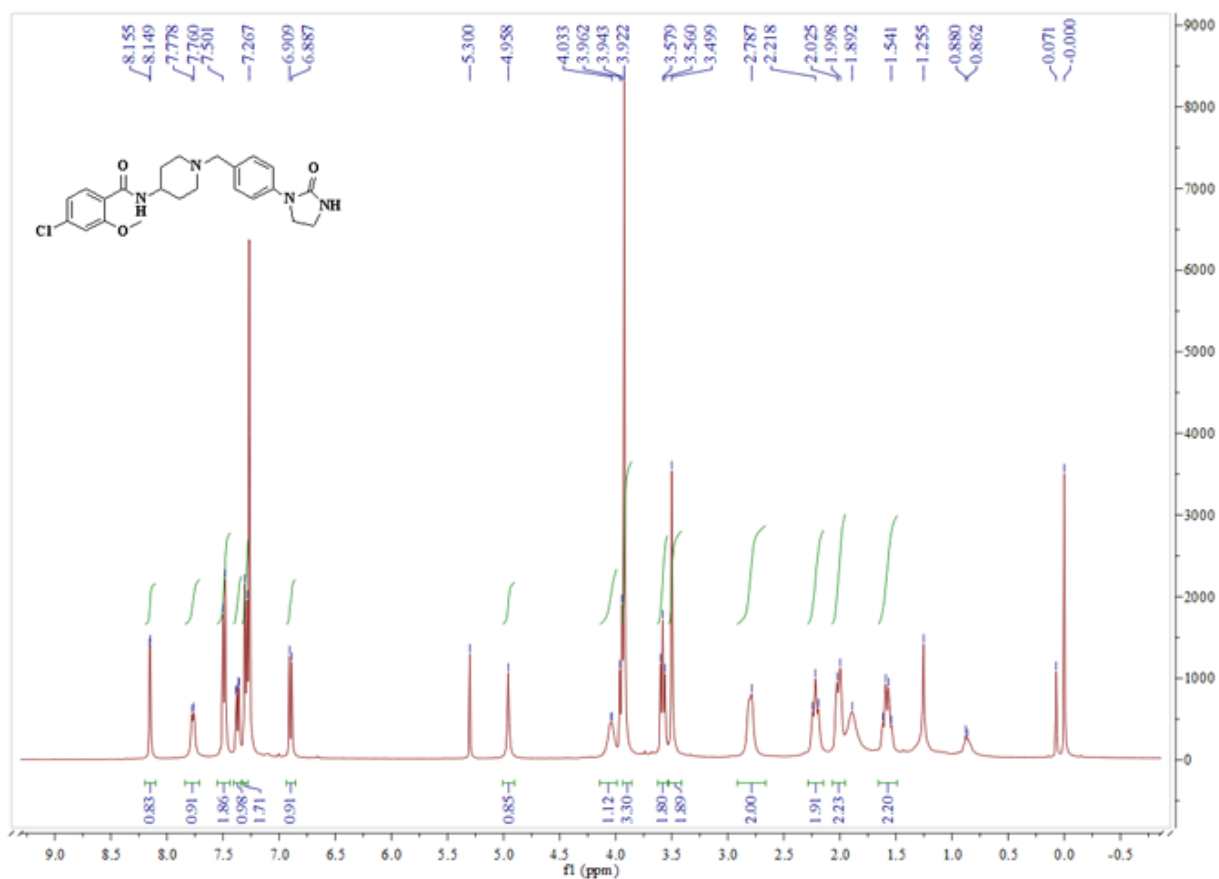**Figure S10.**  $^1\text{H}$ -NMR of compound **7k** in  $\text{CDCl}_3$ .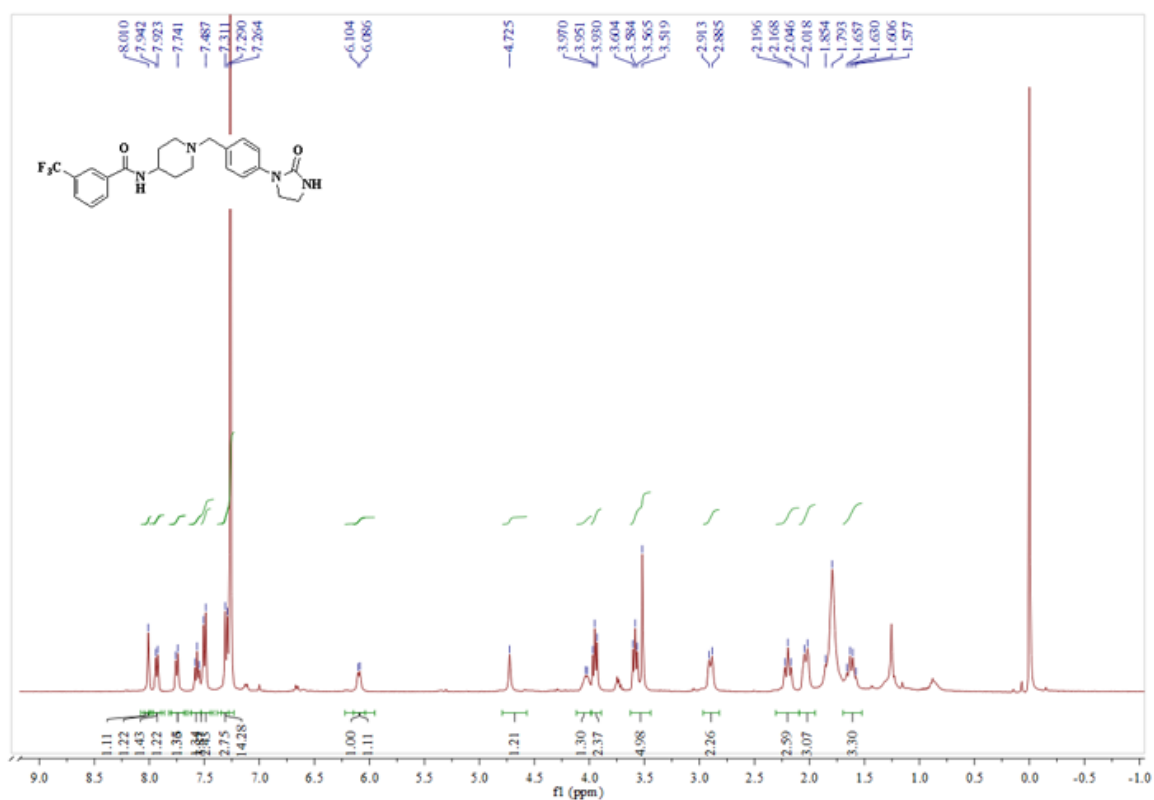

**Figure S11.**  $^1\text{H}$ -NMR of compound **7l** in  $\text{DMSO}-d_6$ .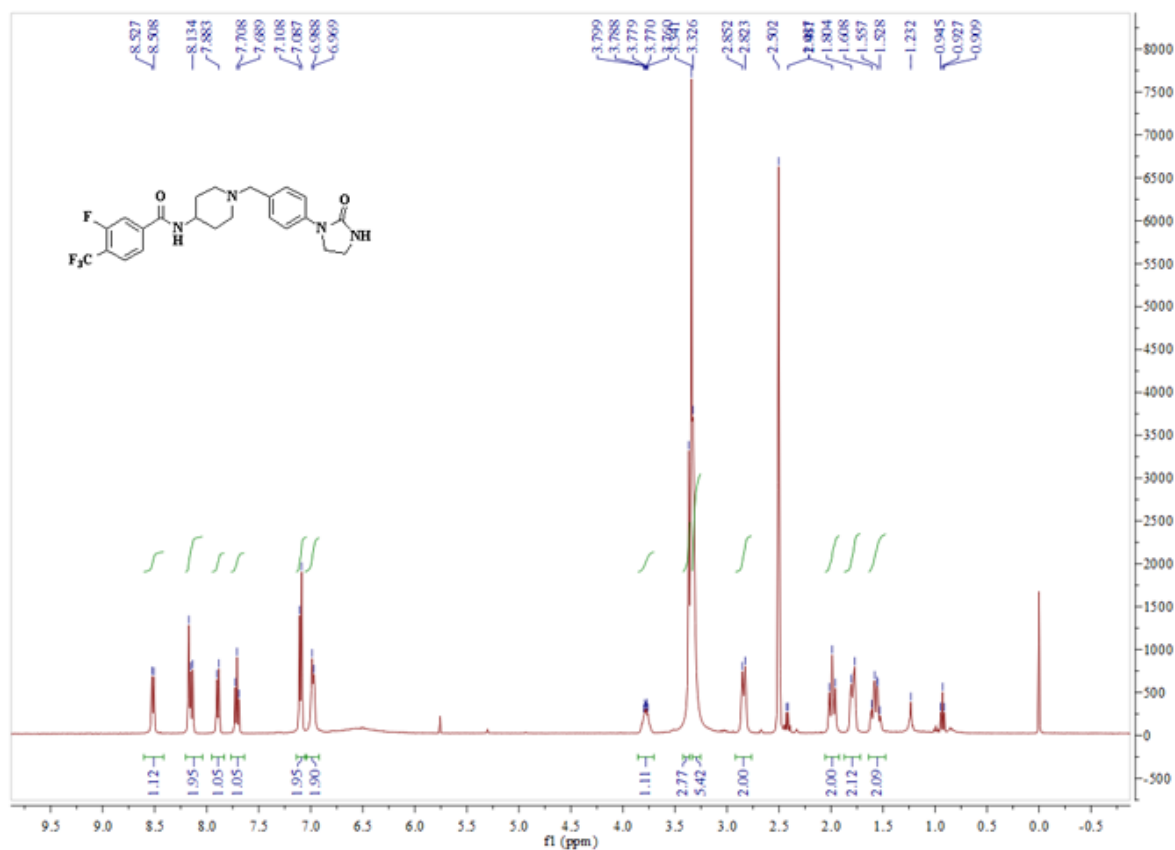**Figure S12.**  $^1\text{H}$ -NMR of compound **8a** in  $\text{CDCl}_3$ .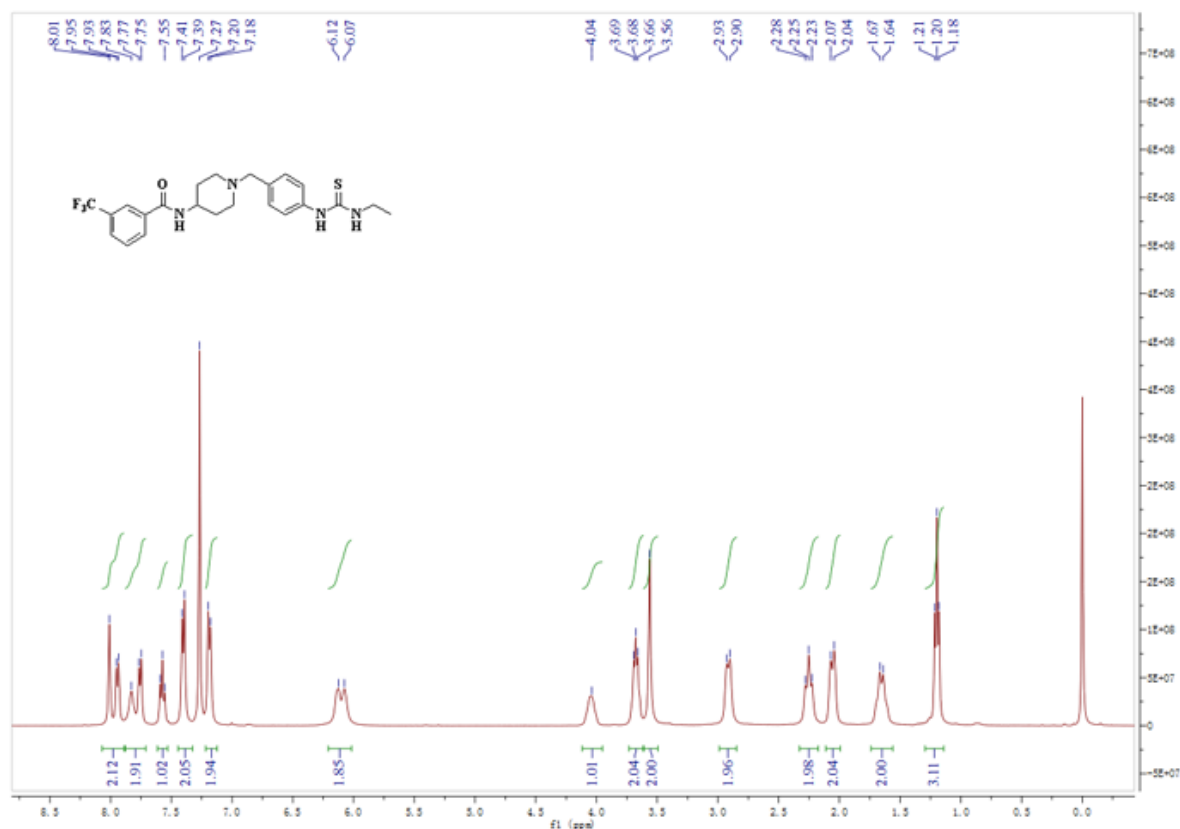

Figure S13.  $^1\text{H}$ -NMR of compound **8b** in  $\text{CDCl}_3$ .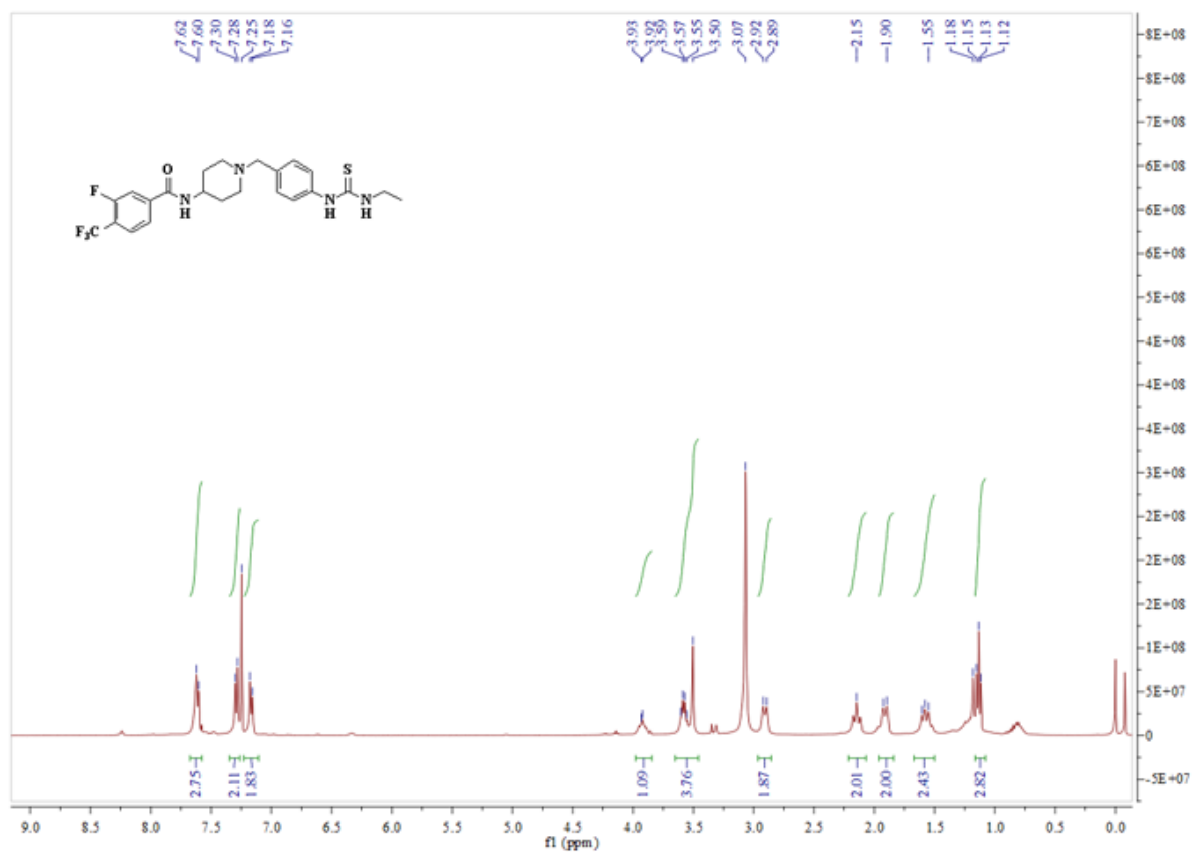Figure S14.  $^1\text{H}$ -NMR of compound **8c** in  $\text{DMSO}-d_6$ .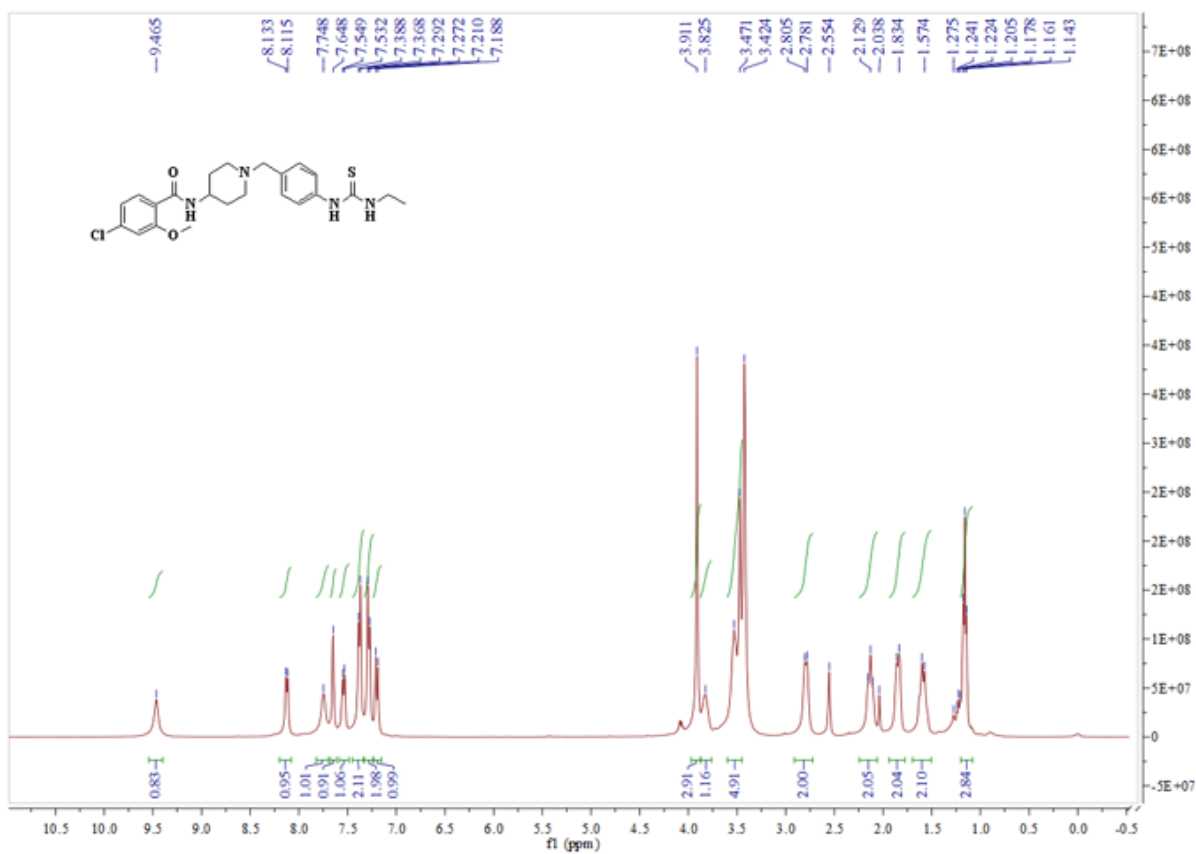

Figure S15.  $^1\text{H}$ -NMR of compound **14a** in  $\text{CDCl}_3$ .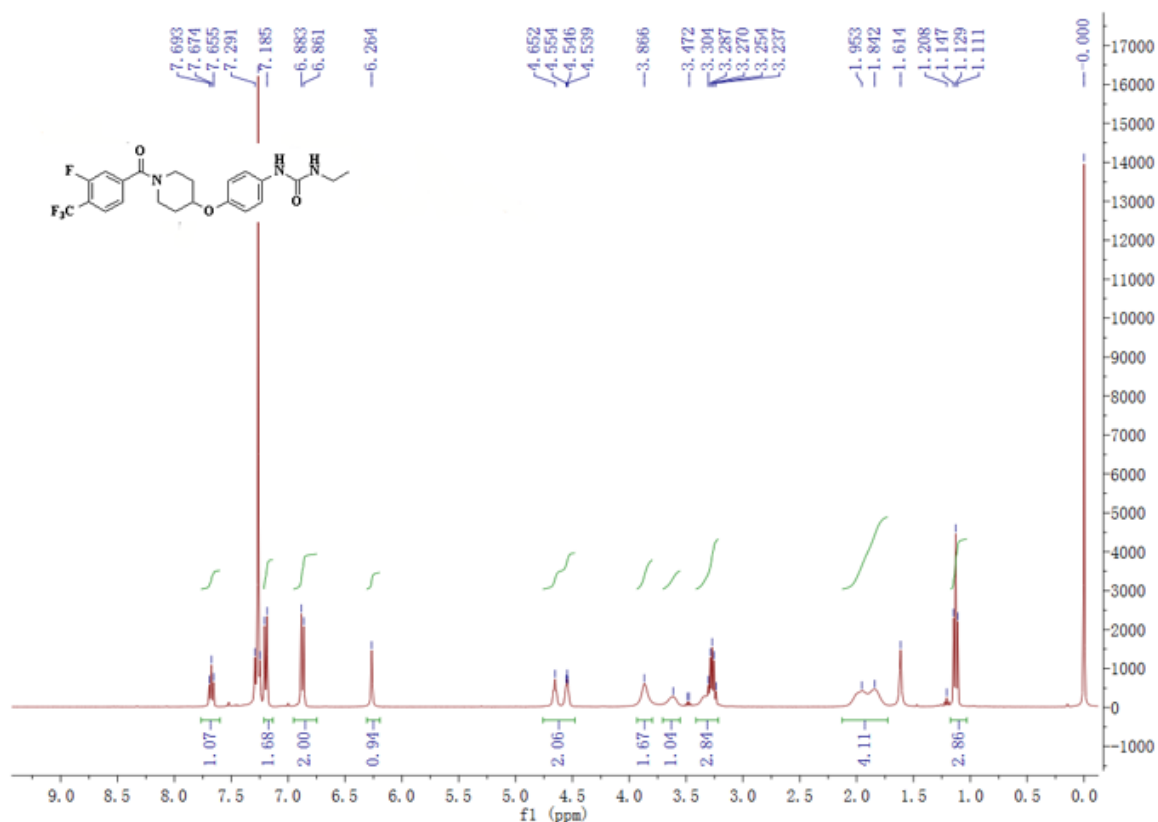Figure S16.  $^1\text{H}$ -NMR of compound **14b** in  $\text{CDCl}_3$ .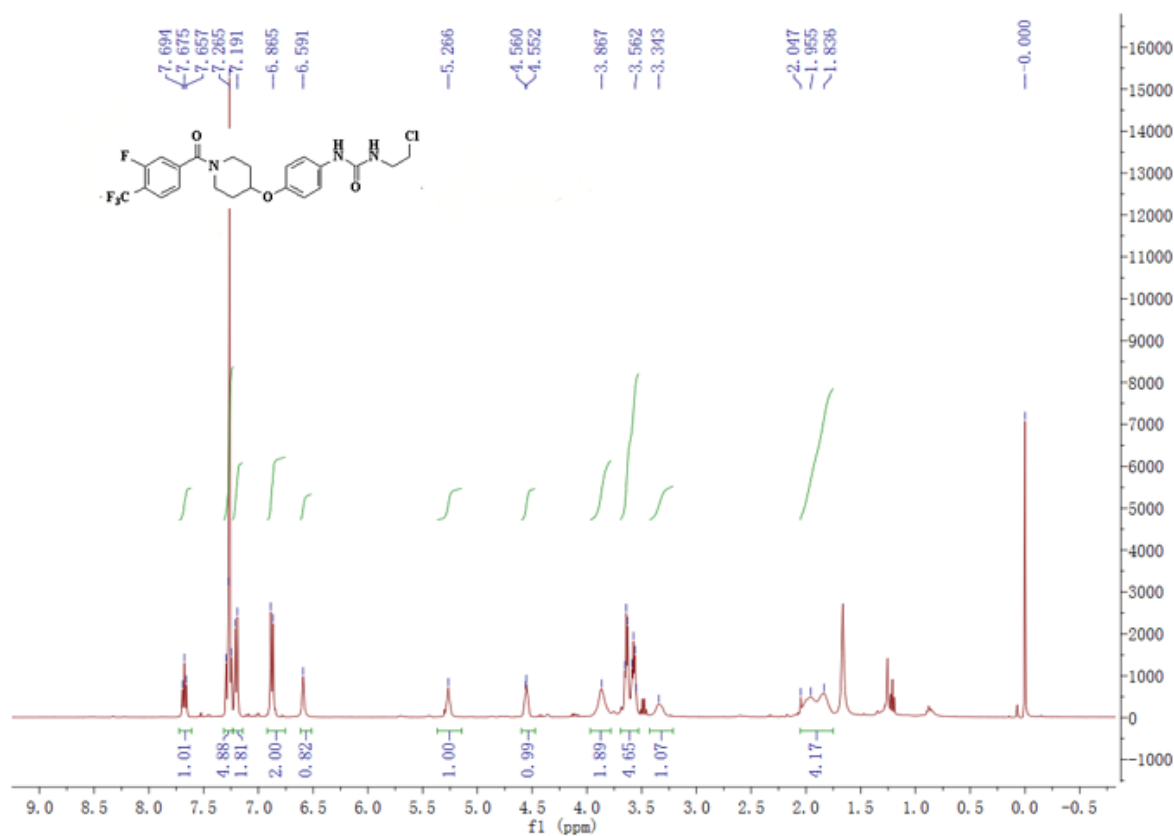



Figure S17.  $^1\text{H}$ -NMR of compound **14c** in  $\text{CDCl}_3$ .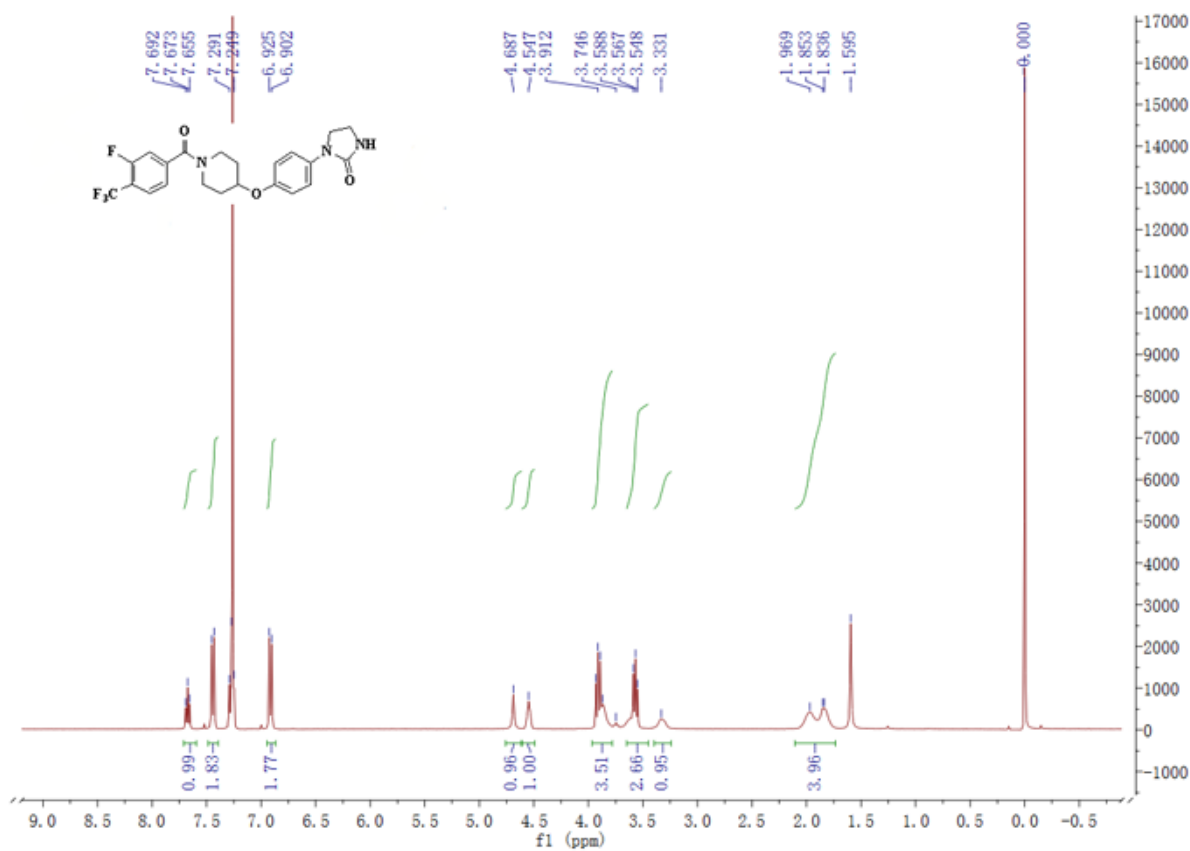Figure S18.  $^1\text{H}$ -NMR of compound **14d** in  $\text{DMSO}-d_6$ .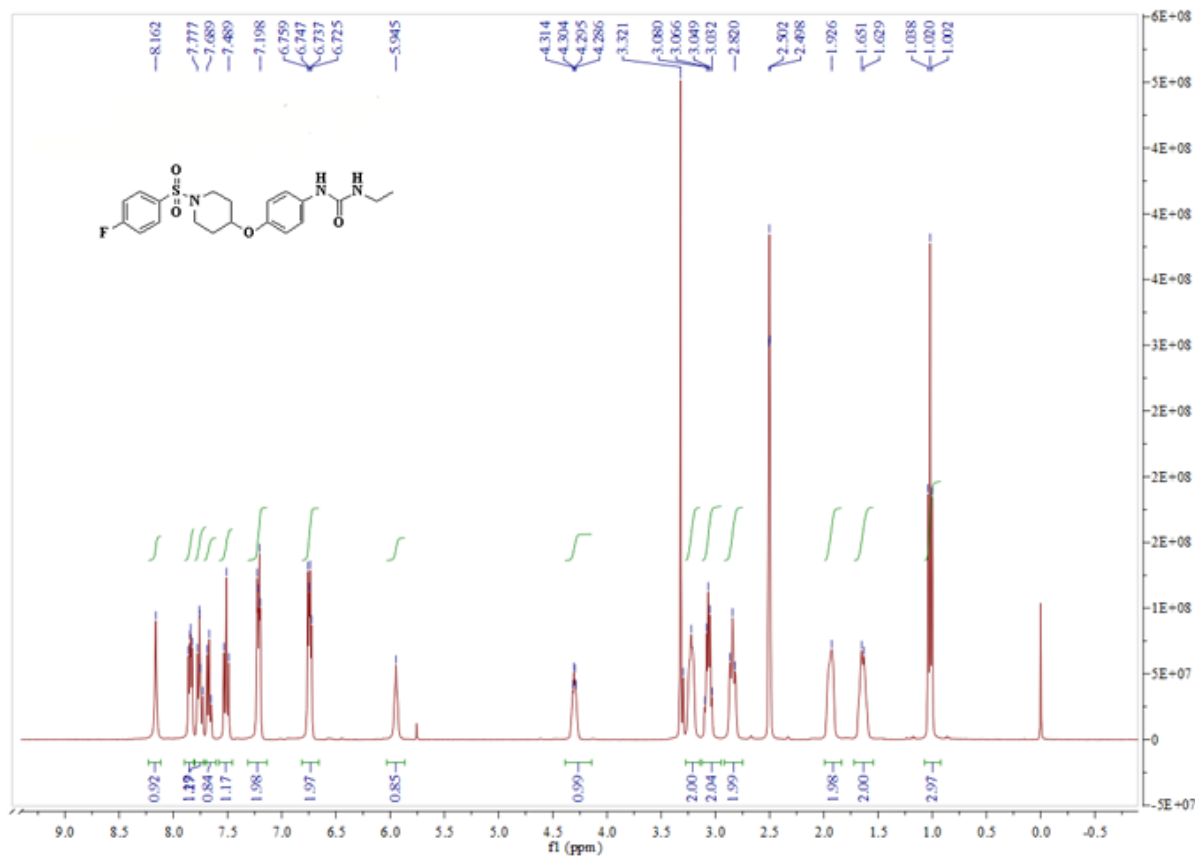

Figure S19.  $^1\text{H}$ -NMR of compound 17b in  $\text{DMSO}-d_6$ .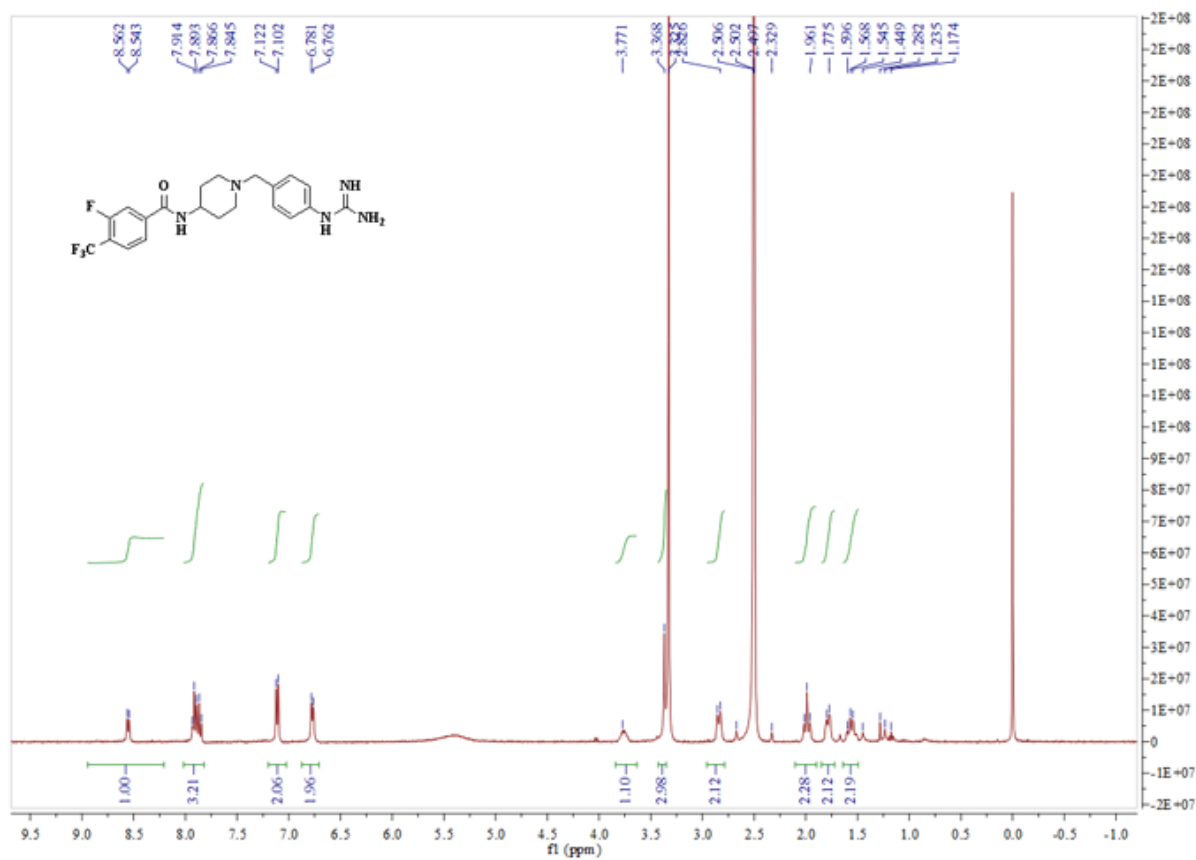Figure S20.  $^1\text{H}$ -NMR of compound 17d in  $\text{CDCl}_3$ .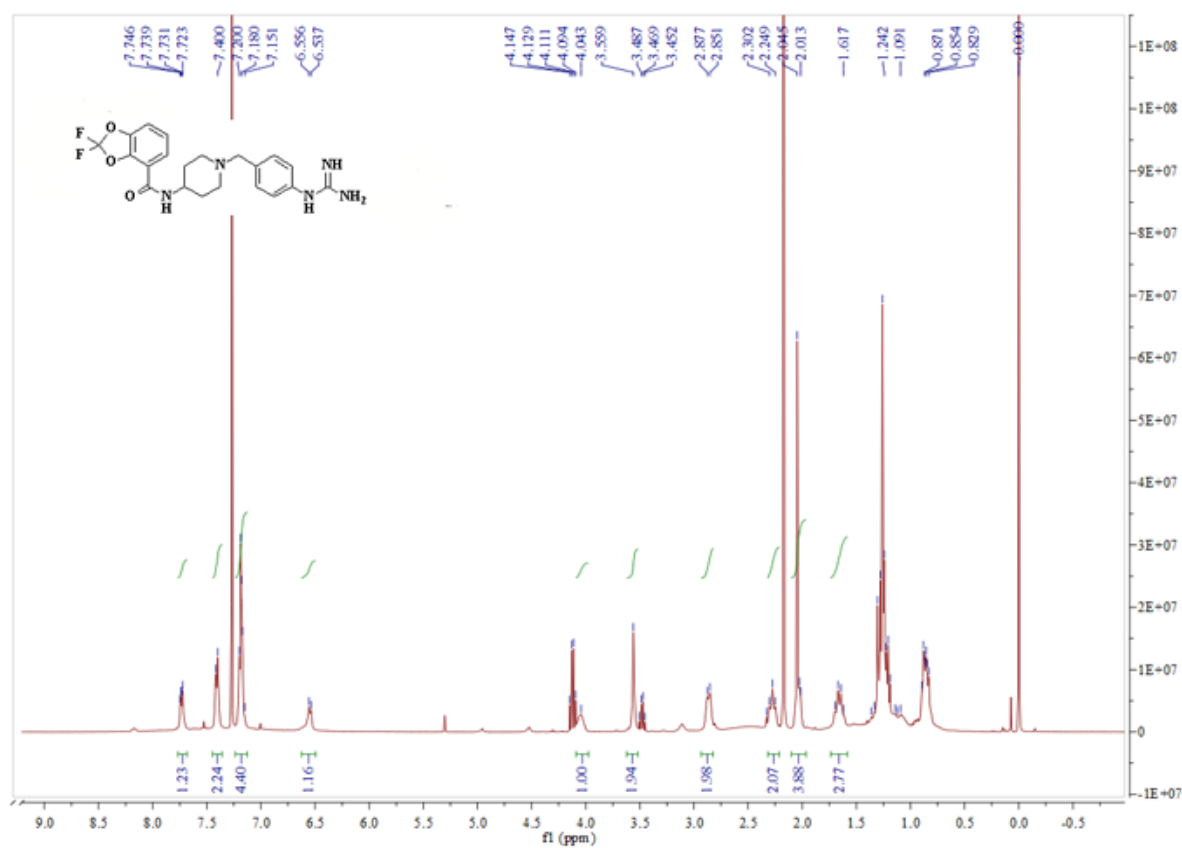

Figure S21.  $^1\text{H}$ -NMR of compound 17f in  $\text{CD}_3\text{OD}$ .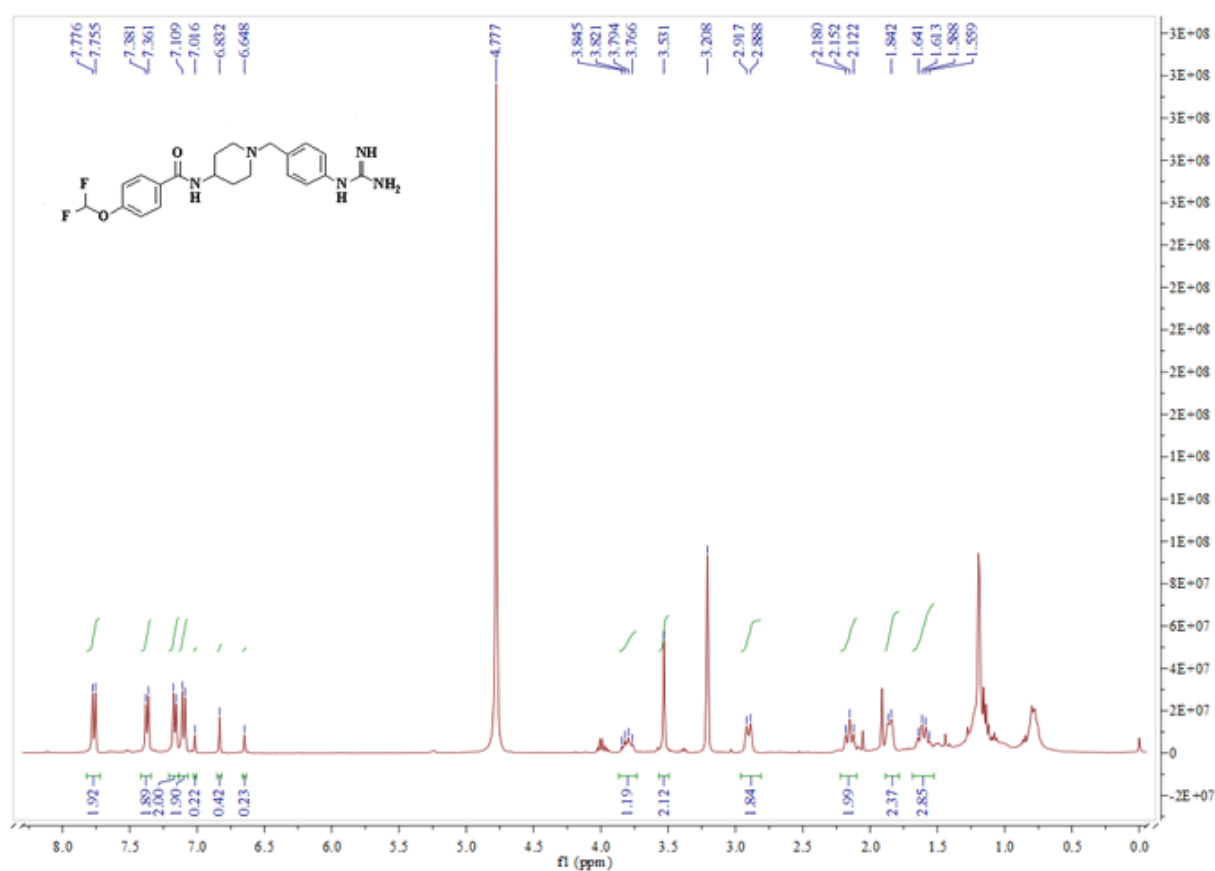Figure S22.  $^1\text{H}$ -NMR of compound 17g in  $\text{CDCl}_3$ .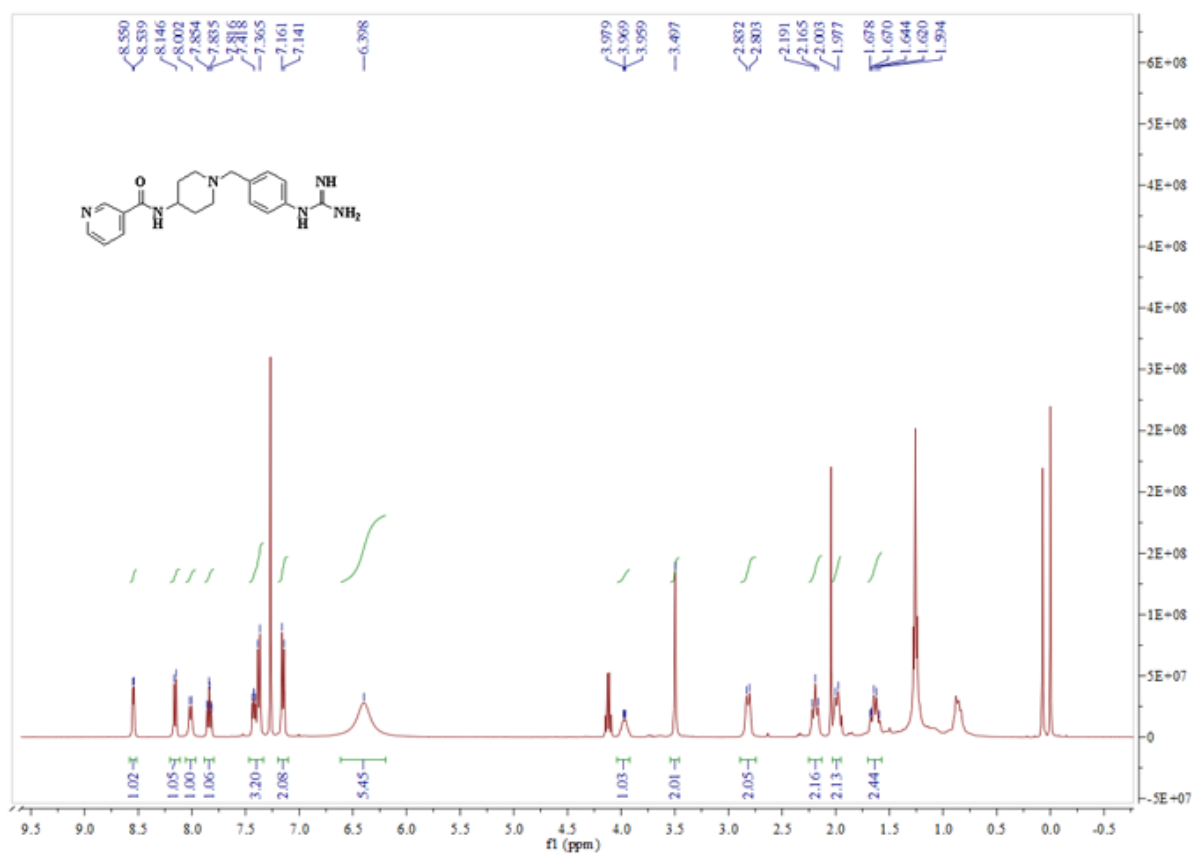

**Figure S23.**  $^1\text{H}$ -NMR of compound **17h** in  $\text{CDCl}_3$ .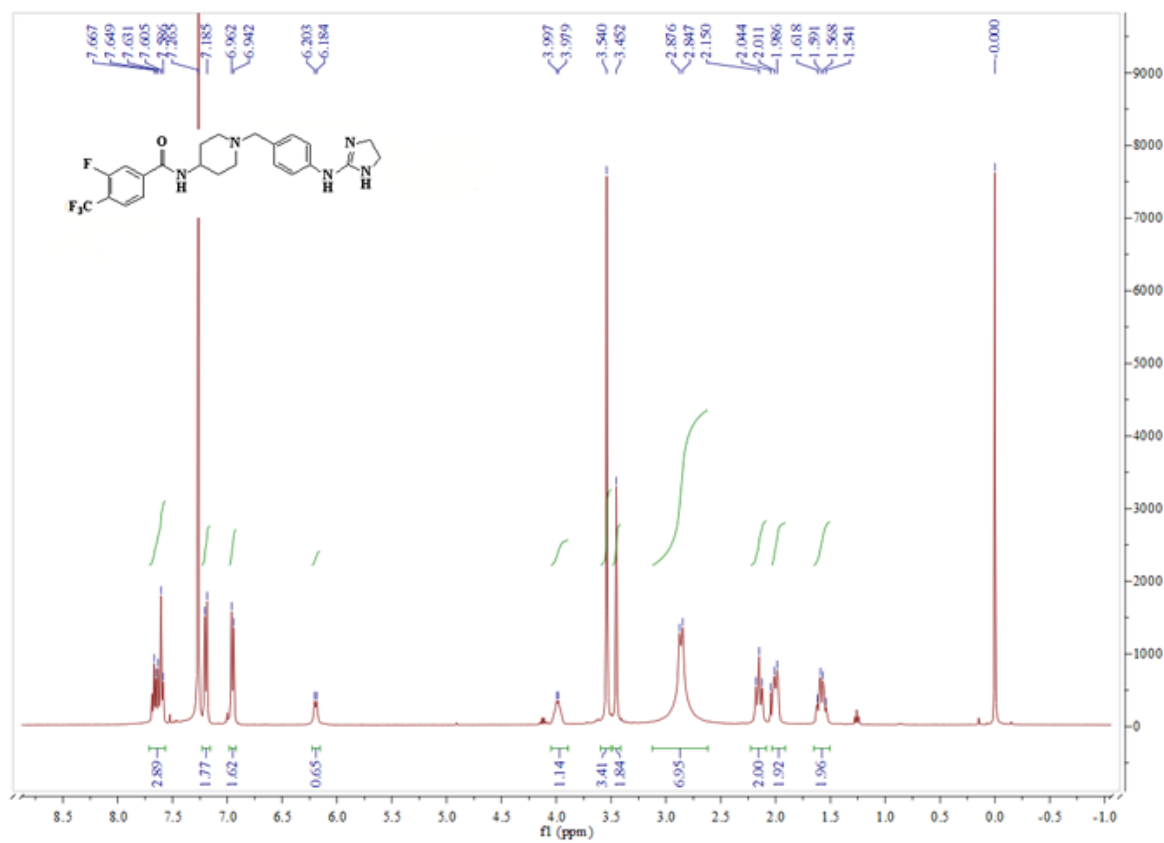**Figure S24.**  $^1\text{H}$ -NMR of compound **17i** in  $\text{CDCl}_3$ .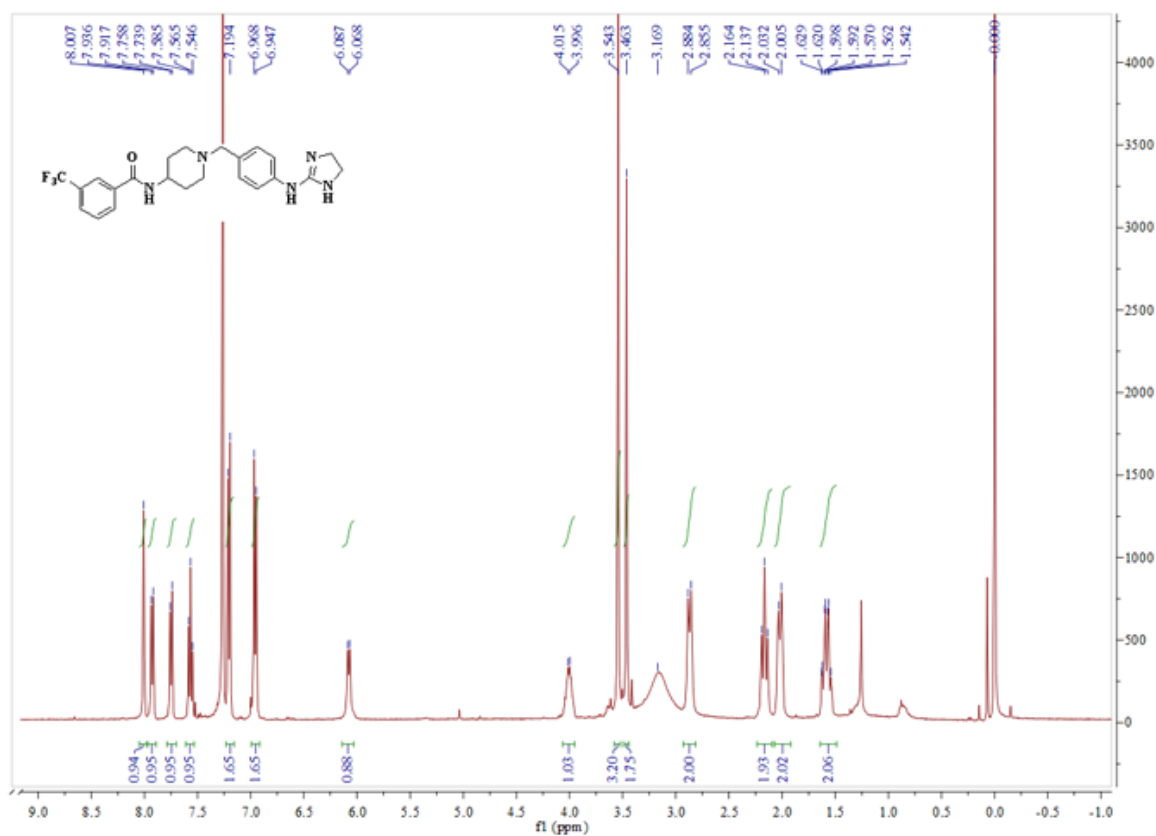

2. The  $^{13}\text{C}$ -NMR and HPLC spectra of *N*-(1-(4-(3-(2-Chloroethyl)ureido)benzyl)piperidin-4-yl)-3-(trifluoromethyl) benzamide (**7i**).

Figure S25. The  $\text{C}^{13}$  spectrum of **7i**.

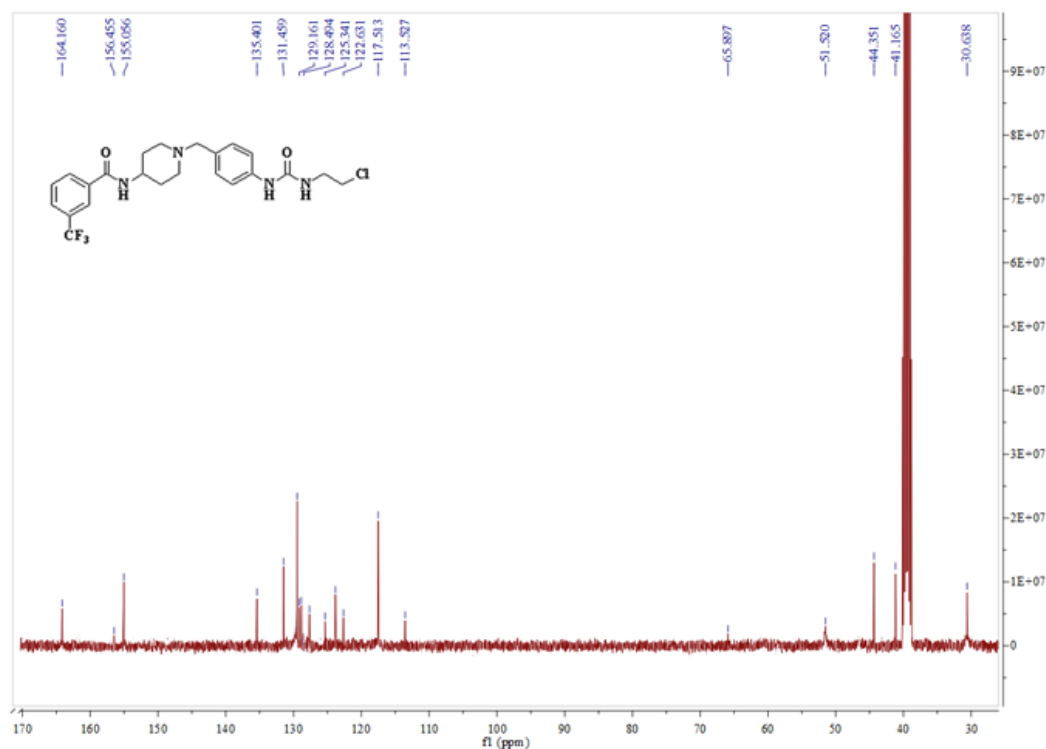

$^{13}\text{C}$ -NMR ( $\text{DMSO}-d_6$ )  $\delta$ : 30.6, 41.1, 44.3, 51.6, 65.9, 113.5, 117.4, 122.6, 123.7, 125.3, 127.6, 128.8, 129.2, 129.5, 131.5, 135.4, 155.1, 156.5, 164.2.

Figure S26. The HPLC spectrum of 7i.

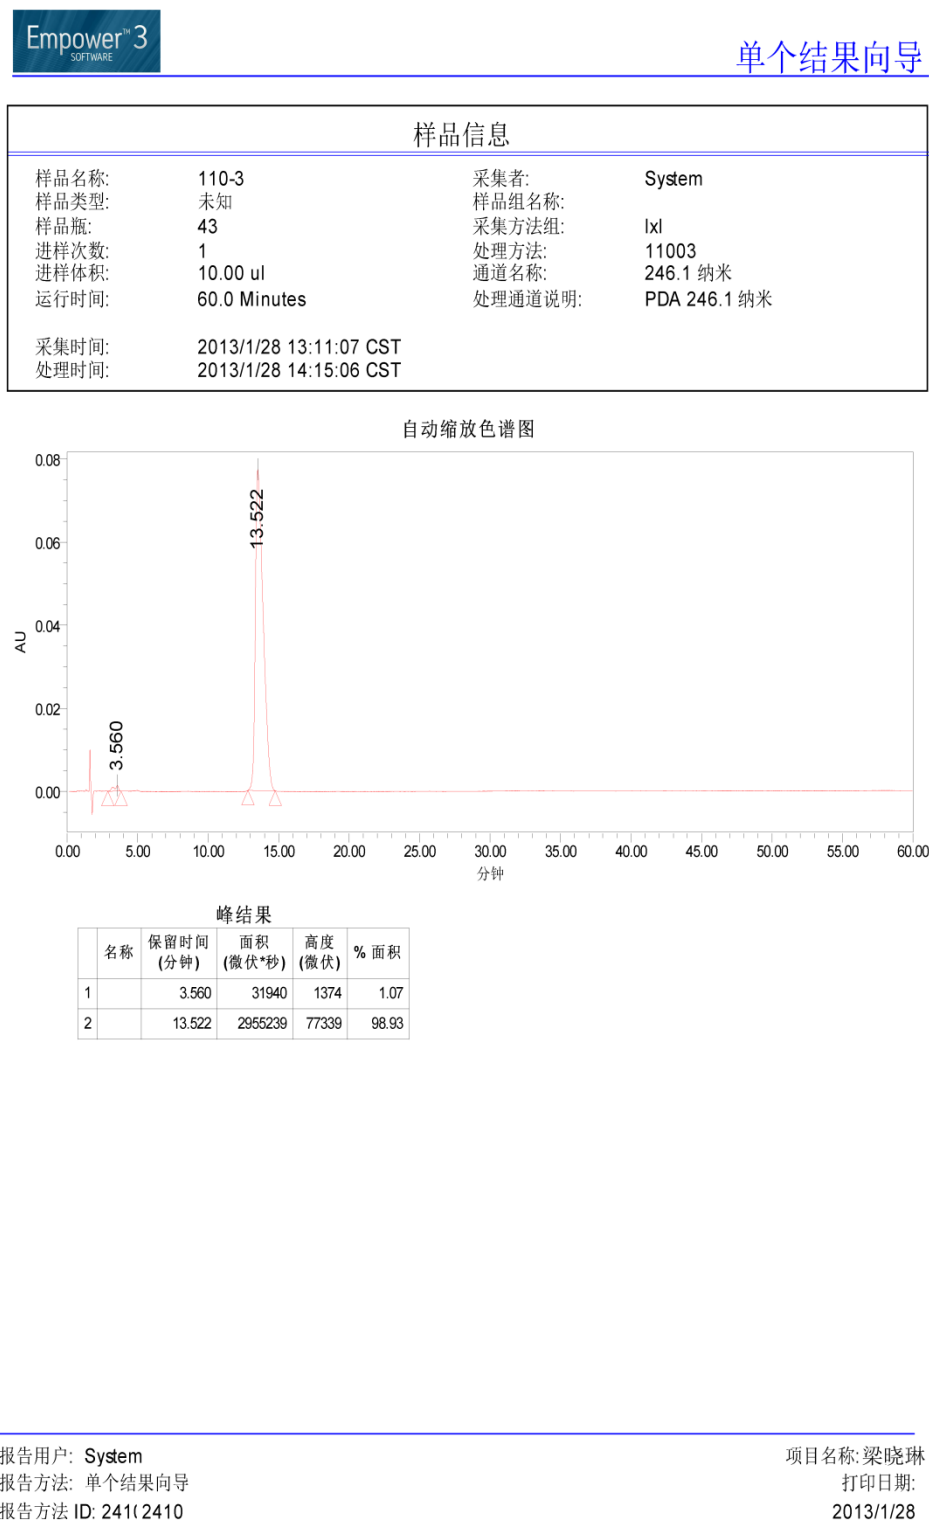

Supplement: s1 [file s1]
